# Supplementary material for: Activity-dependent changes in synaptic protein complex composition are consistent in different detergents despite differential solubility
Source: PubMed Central journal article supplement (PMC6659712; doi:10.1038/s41598-019-46690-y), 2019-07-26
Supplement: 41598_2019_46690_MOESM1_ESM.pdf [file 41598_2019_46690_MOESM1_ESM.pdf]

## Supplementary Information for

### Activity-dependent changes in synaptic protein complex composition are consistent in different detergents despite differential solubility

**Authors:** Jonathan D. Lautz<sup>1</sup>, Edward P. Gniffke<sup>1</sup>, Emily A. Brown<sup>1,2</sup>, Karen B. Immendorf<sup>1</sup>, Ryan D. Mendel<sup>1</sup>, Stephen E.P. Smith<sup>1,2,3\*</sup>

Figures S1 and S2

Table S1: Lysis buffer composition

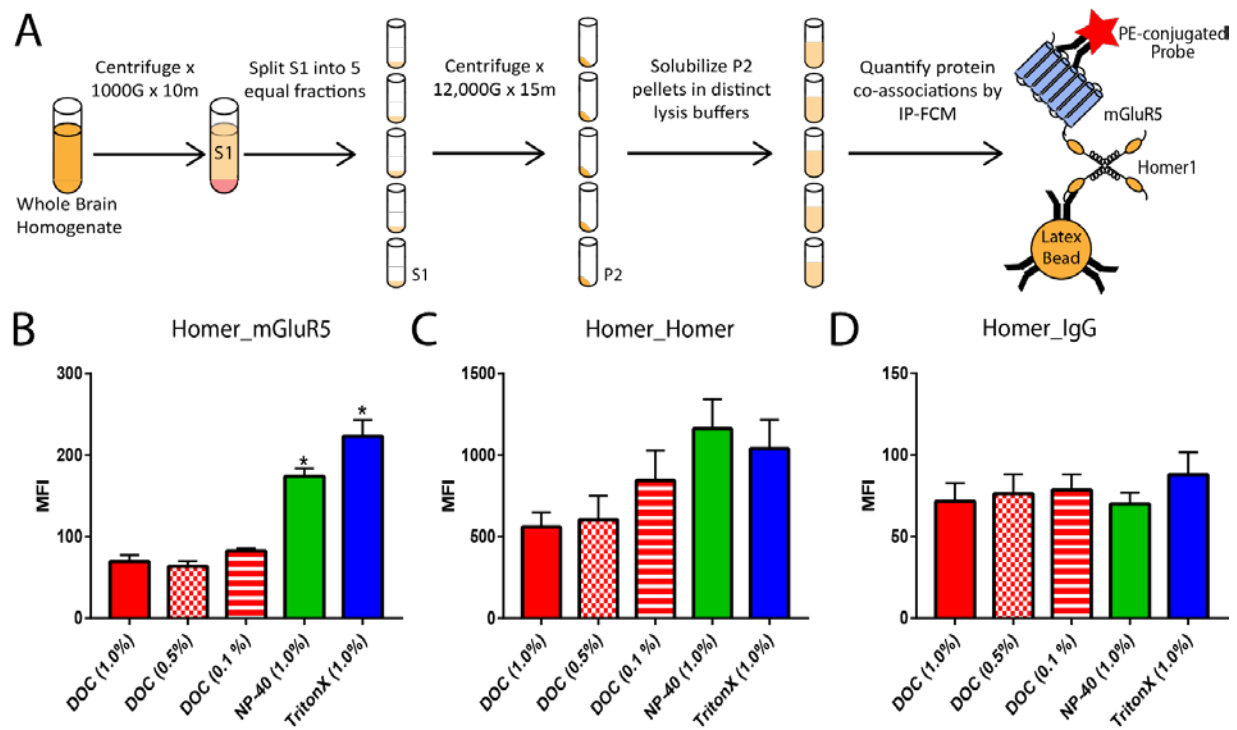

Figure S1: (A) Workflow. (B-D) Quantification of Homer\_mGluR5, Homer\_Homer and Homer\_IgG in five lysis buffers. N=3 experiments. \* $p < 0.05$ , paired Student's t-test.

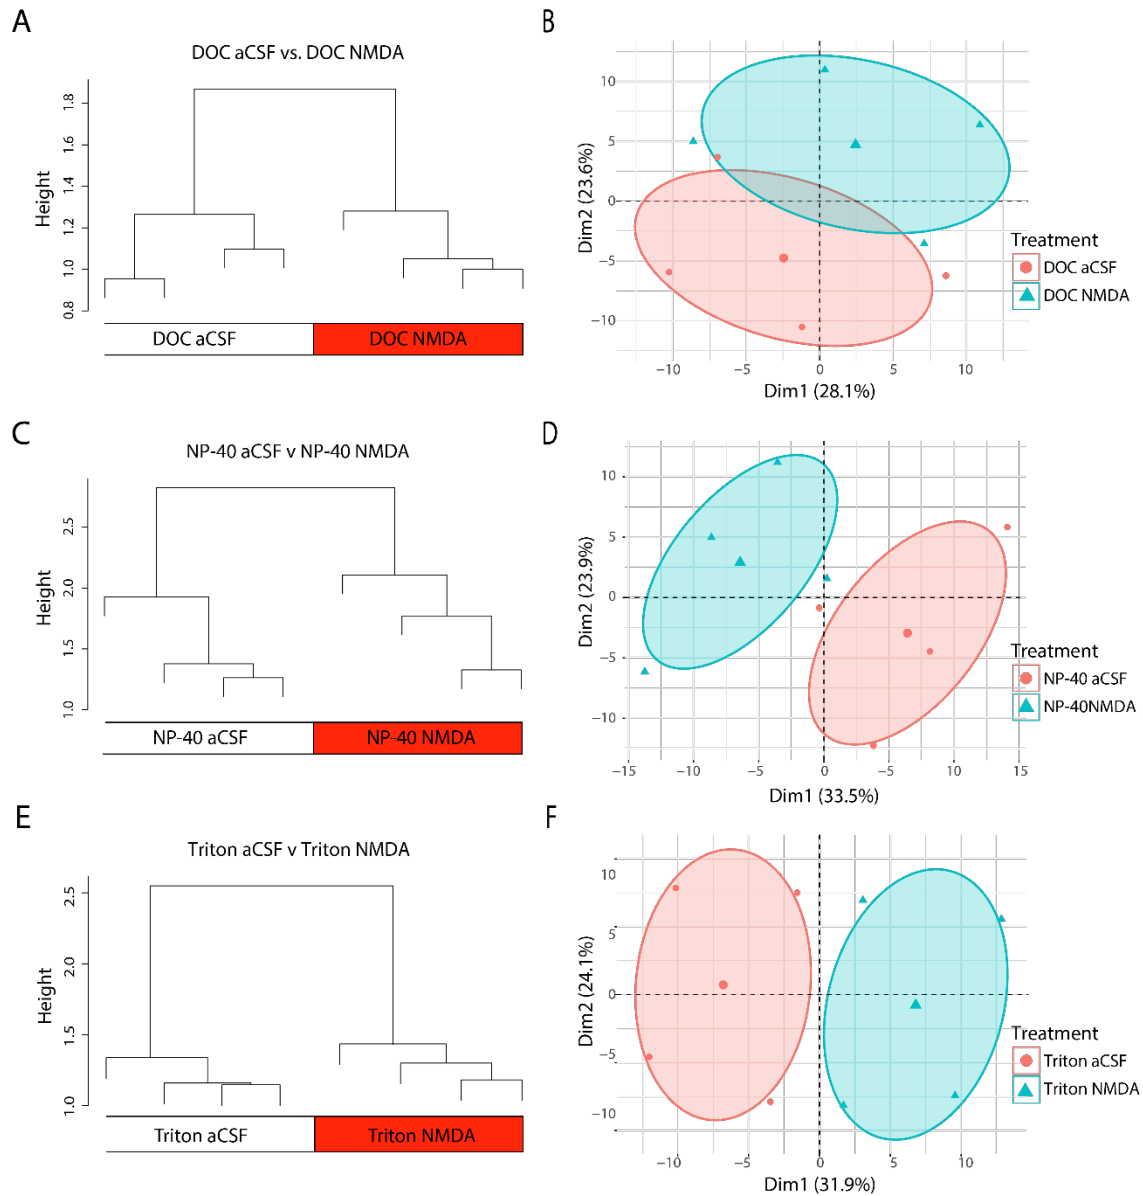

Figure S2: PCA and Clustering of NMDA stimulation analyzed separately for each detergent. A,B) Clustering and PCA for NMDA vs. aCSF for DOC. C,D) Clustering and PCA for NMDA vs. aCSF for NP-40. E,F) Clustering and PCA for NMDA vs. aCSF for Triton.

Table S1

| <b>Lysis Buffer</b> | <b>Recipe</b>                                                                                                                                 |
|---------------------|-----------------------------------------------------------------------------------------------------------------------------------------------|
| DOC (pH 9.0)        | 50 mM Tris (pH 9.0), 30 mM NaF, 5 mM sodium orthovanadate + Protease/phosphatase inhibitor cocktails (Sigma), .02 mM ZnCl <sub>2</sub>        |
| DOC (TBS)           | 150mM NaCl, 50mM Tris (pH 7.4), DOC, 10 mM NaF, 2 mM sodium orthovanadate + Protease/phosphatase inhibitor cocktails (Sigma)                  |
| NP-40 (TBS)         | 150mM NaCl, 50mM Tris (pH 7.4), 1% NP-40, 10 mM NaF, 2 mM sodium orthovanadate + Protease/phosphatase inhibitor cocktails (Sigma)             |
| Triton (TBS)        | 150mM NaCl, 50mM Tris (pH 7.4), 1% Triton, 10 mM NaF, 2 mM sodium orthovanadate + Protease/phosphatase inhibitor cocktails (Sigma)            |
| DOC (EGTA)          | 150mM NaCl, 50mM Tris (pH 7.4), 1% DOC, 10 mM NaF, 2 mM sodium orthovanadate + Protease/phosphatase inhibitor cocktails (Sigma), 2 mM EGTA    |
| NP-40 (EGTA)        | 150mM NaCl, 50mM Tris (pH 7.4), 1%NP-40, 10 mM NaF, 2 mM sodium orthovanadate + Protease/phosphatase inhibitor cocktails (Sigma), 2 mM EGTA   |
| Triton (EGTA)       | 150mM NaCl, 50mM Tris (pH 7.4), 1% Triton, 10 mM NaF, 2 mM sodium orthovanadate + Protease/phosphatase inhibitor cocktails (Sigma), 2 mM EGTA |
| DOC (HEPES)         | 150mM NaCl, 50mM HEPES (pH 7.4), DOC, 10 mM NaF, 2 mM sodium orthovanadate + Protease/phosphatase inhibitor cocktails (Sigma)                 |
| NP-40 (HEPES)       | 150mM NaCl, 50mM HEPES (pH 7.4), NP-40, 10 mM NaF, 2 mM sodium orthovanadate + Protease/phosphatase inhibitor cocktails (Sigma)               |
| Triton (HEPEPS)     | 150mM NaCl, 50mM HEPES (pH 7.4), Triton, 10 mM NaF, 2 mM sodium orthovanadate + Protease/phosphatase inhibitor cocktails (Sigma)              |
